# Supplementary material for: Facile synthesis of polypyrrole nanoparticles with tunable conductivity for efficient electromagnetic wave absorption and shielding performance
Source: Royal Society of Chemistry journal article supplement (doi:10.1039/d2ce00206j), 2022-01-01
Supplement: d2ce00206j1.pdf [file d2ce00206j1.pdf]

## Electronic Supplementary Material

### Facile synthesis of polypyrrole nanoparticles with tunable conductivity for efficient electromagnetic wave absorption and shielding performance

Yun-Liang Dai, Xiao-Juan Zhang, <sup>\*a</sup>, Bian-Ying Wen<sup>\*a</sup> and Qiu-Yue Du<sup>b</sup>

<sup>a</sup>College of Chemistry and Materials Engineering, Beijing Technology and Business University, Beijing 100048, P. R. China E-mail: zhxiaojuan@btbu.edu.cn; wenbianying@tsinghua.org.cn

<sup>b</sup>School of Artificial Intelligence · Beijing Technology and Business University, Beijing, 100048, P. R. China

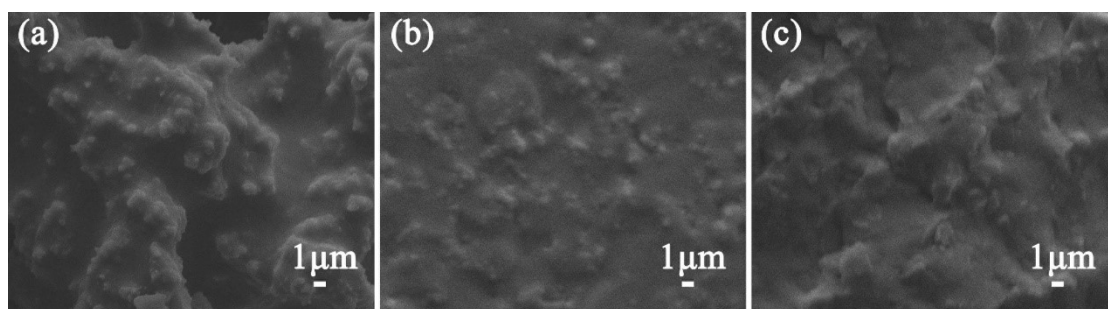

**Fig. S1** SEM images of fracture section of PPY/TPU membrane: (a) PPY<sub>1:1</sub>/TPU, (b) PPY<sub>1:2</sub>/TPU and (c) PPY<sub>1:3</sub>/TPU.

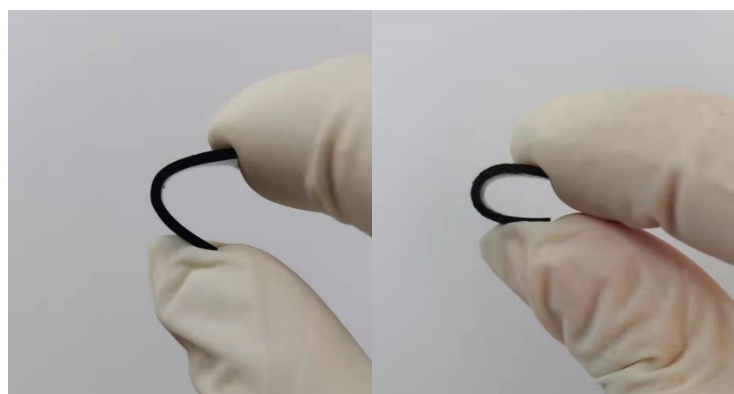

**Fig. S2** The digital photograph of flexible PPY /TPU platelet.

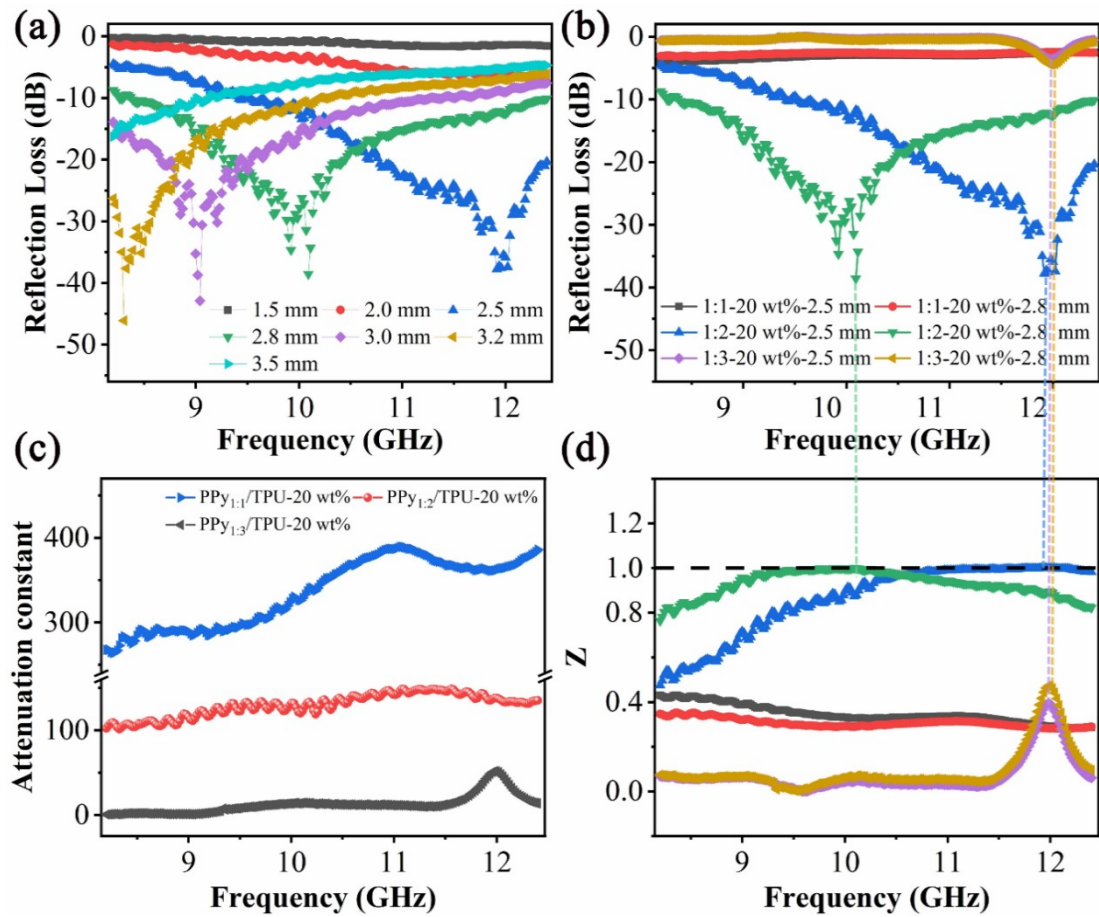

**Fig. S3** (a) RL diagrams of PPy<sub>1.2</sub>/TPU (20 wt%) among various thicknesses, (b) RL diagrams of PPy/TPU (20 wt%) within different molar ratios, (c) attenuation constant and (d) impedance matching coefficient of PPy/TPU composites under different molar ratios at a filler loading of 20 wt%.

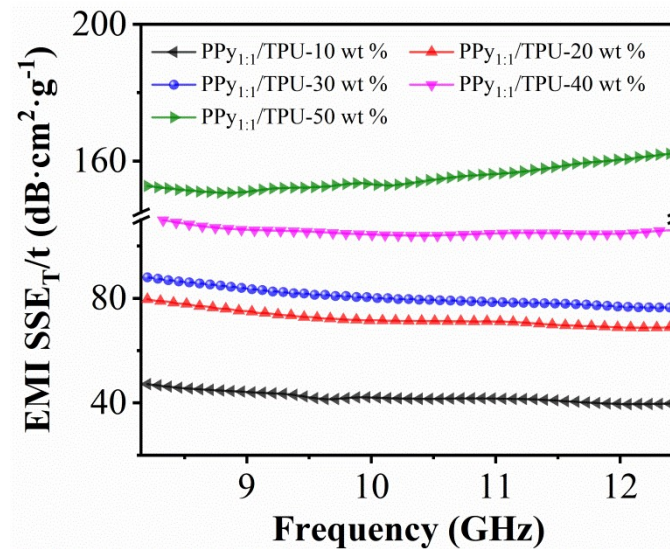

**Fig. S4** EMI SSE<sub>T</sub>/t of PPy<sub>1.1</sub>/TPU composite within various filler loadings.

**Table. S1** Density and thickness of PPy/TPU composites at different filler loadings.

| Filler Content | Samples | PPy <sub>1:1</sub> /TPU | Thickness | PPy <sub>1:2</sub> /TPU | Thickness | PPy <sub>1:3</sub> /TPU | Thickness |
|----------------|---------|-------------------------|-----------|-------------------------|-----------|-------------------------|-----------|
|                |         | (g·cm <sup>-3</sup> )   | mm        | (g·cm <sup>-3</sup> )   | mm        | (g·cm <sup>-3</sup> )   | mm        |
| 0 wt%          |         | 1.103                   | 1.51      | 1.103                   | 1.51      | 1.103                   | 1.51      |
| 10 wt%         |         | 1.127                   | 1.59      | 1.129                   | 1.65      | 1.140                   | 1.50      |
| 20 wt%         |         | 1.165                   | 1.52      | 1.174                   | 1.43      | 1.180                   | 1.41      |
| 30 wt%         |         | 1.199                   | 1.53      | 1.201                   | 1.58      | 1.211                   | 1.44      |
| 40 wt%         |         | 1.206                   | 1.70      | 1.219                   | 1.28      | 1.238                   | 1.33      |
| 50 wt%         |         | 1.230                   | 1.80      | 1.246                   | 1.28      | 1.277                   | 1.90      |

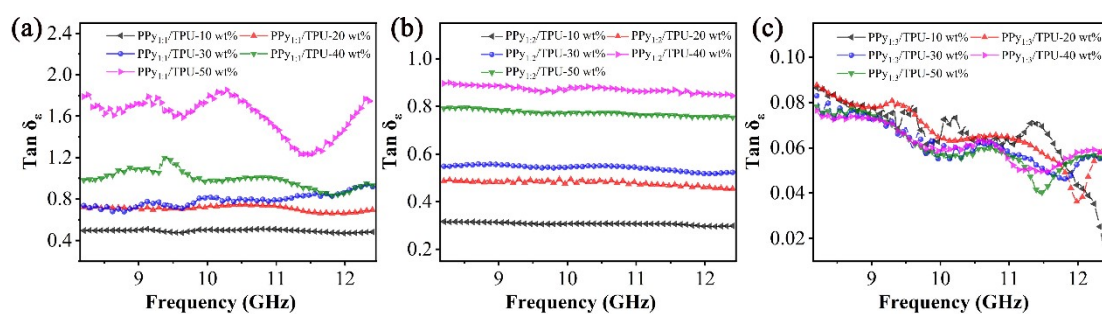

**Fig. S5** Dielectric loss tangent of PPy/TPU composites within different filler loadings: (a) PPY<sub>1:1</sub>/TPU, (b) PPY<sub>1:2</sub>/TPU and (c) PPY<sub>1:3</sub>/TPU.
